# Supplementary material for: Physiological performance of transplastomic tobacco plants overexpressing aquaporin AQP1 in chloroplast membranes
Source: PubMed Central journal article supplement (PMC6022695; doi:10.1093/jxb/ery148), 2018-04-18
Supplement: erx148_suppl_supplementary-material.pdf [file erx148_suppl_supplementary-material.pdf]

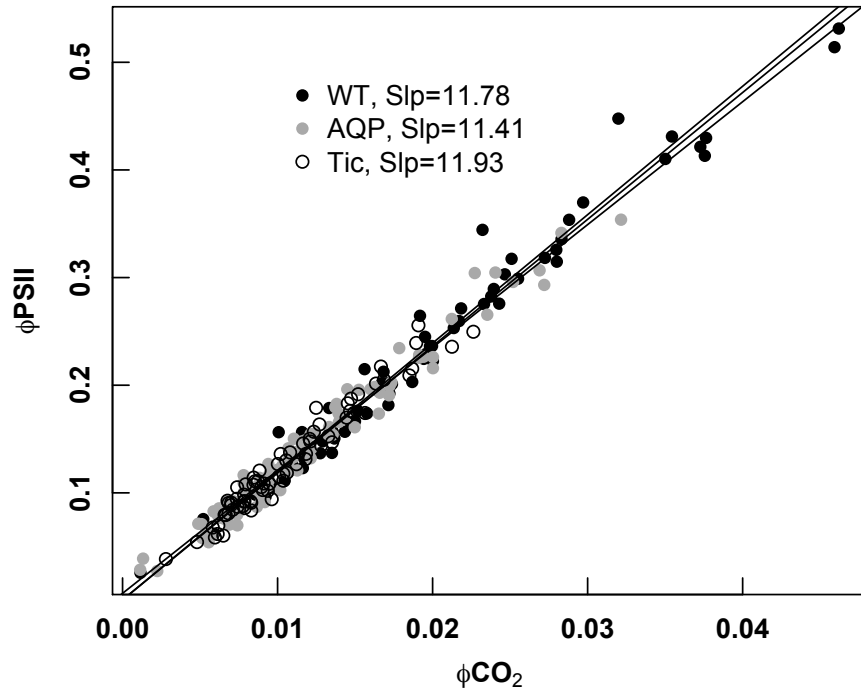

**Supplementary Figure S1.** Relationship between  $\Phi_{PSII}$  vs  $\Phi_{CO_2}$  used to correct ETR. Values of the slope for each genotype are indicated in the legend. The  $\alpha^*\beta$  factor was calculated as  $4/\text{slope}$ , for each single plant measured (see M&M, Valentini *et al.*, 1995 ; Pons *et al.*, 2009 and Martins *et al.*, 2013).

**A**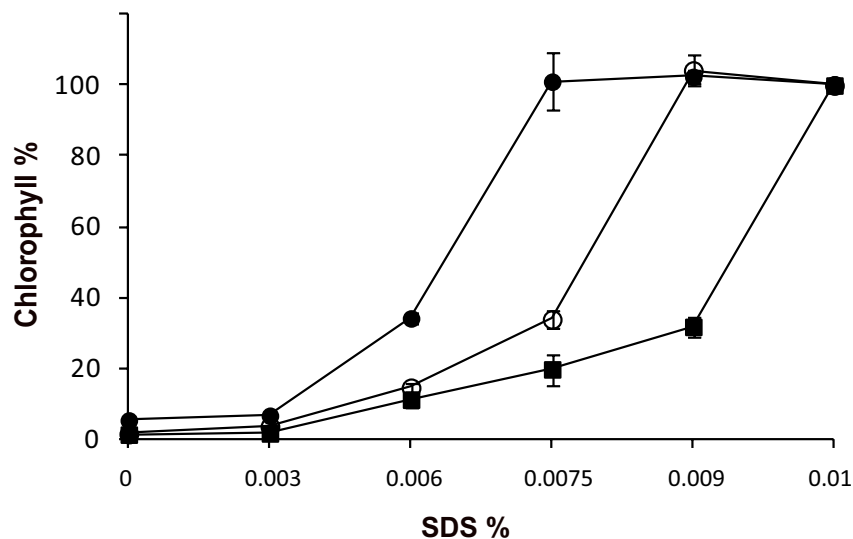**B**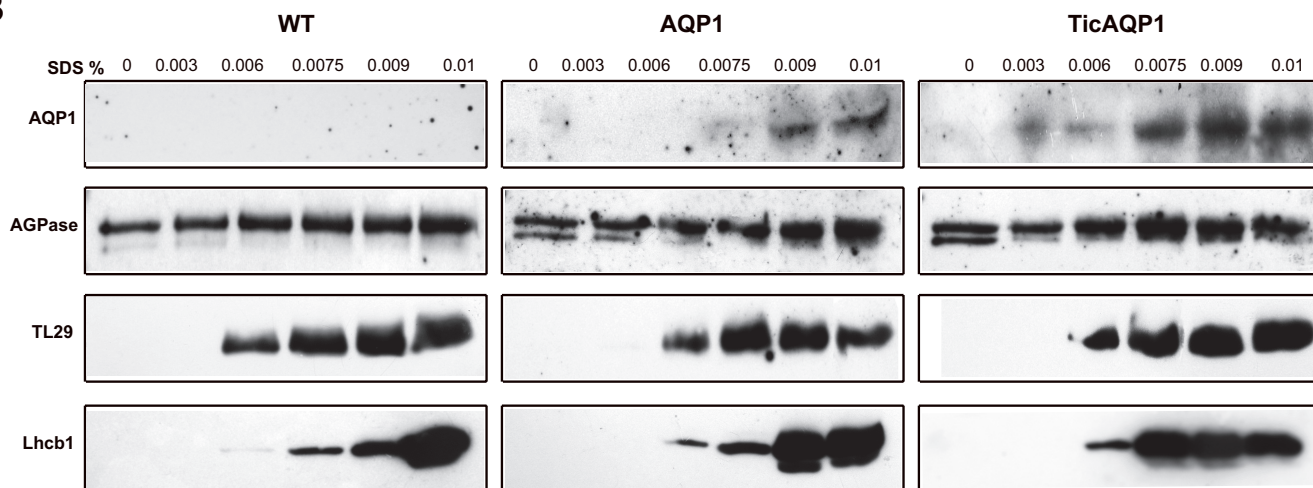**C**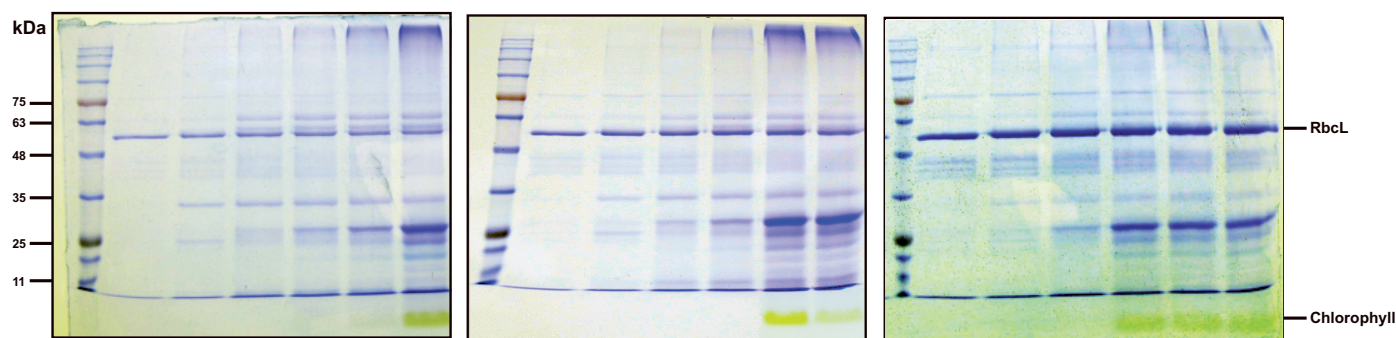

**Supplementary Figure S2.** Membrane disruption of wild-type (WT), AQP1 and TicAQP1 chloroplasts treated with increasing concentrations of SDS. (A) Chlorophyll released after a 10 min treatment with the corresponding SDS concentration. WT (square), AQP1 (open circle) and TicAQP1 (filled circle) (n=3). (B) Immunoblot analysis with antibodies against AQP1, AGPase, TL29 (thylakoid lumen protein) and Lhcb1 (thylakoid membrane protein) of supernatants after each treatment. (C) Coomassie blue-stained SDS-PAGE of supernatants from each fraction.
